# Supplementary material for: A mathematical model to improve water storage of glacial lake prediction towards addressing glacial lake outburst floods
Source: Copernicus journal article supplement (doi:10.5194/hess-29-969-2025), 2025-02-24
Supplement: Supplementary file 1 [file hess-29-969-2025-supplement.zip]

## S1. Model Procedure

### S1.1 Volume calculation of elliptic paraboloid

Figure S1 illustrates schematic diagrams of the MDL outlet (a) and inlet (b) as elliptical paraboloids, with their respective volumes labeled as  $V_1$  and  $V_3$ . In this section, we derive the expressions for  $V_1$  and  $V_3$  using the definite integral rule. We denote the semi-major and semi-minor axes of the ellipse in Figure S1 a as  $a_1$  and  $b_1$ , and those of the ellipse in Figure S1 b as  $a_2$  and  $b_2$ . As depicted in Figure S1, points A ( $w \cdot 2^{-1}$ , 0,  $h$ ) and B (0,  $m$ ,  $h$ ) reside on the ellipse  $V_1$ , while points C ( $w \cdot 2^{-1}$ , 0,  $h$ ) and D (0,  $n$ ,  $h$ ) lie on the ellipse  $V_3$ . By utilizing formulas (1) and (2), we can derive the following expressions:

$$a_1 = a_2 = \frac{w}{2\sqrt{h}}, \quad b_1 = \frac{m}{\sqrt{h}}, \quad b_2 = \frac{n}{\sqrt{h}} \quad (\text{S1})$$

The volume of the elliptical paraboloid can be determined by integrating the cross-sectional area with respect to the height variable,  $c$  ( $0 \leq c \leq h$ ). The cross-sectional equation for the ellipsoid paraboloid is expressed as follows:

$$\frac{x^2}{a_1^2} + \frac{y^2}{b_1^2} = c \quad (\text{S2})$$

Thus,

$$V_1 = \int_0^h \frac{1}{2} \pi a_1 b_1 c dc = \frac{\pi a_1 b_1 h^2}{4} = \frac{\pi w m h}{8} \quad (\text{S3})$$

Similarly,

$$V_3 = \int_0^h \frac{1}{2} \pi a_2 b_2 c dc = \frac{\pi a_2 b_2 h^2}{4} = \frac{\pi w n h}{8} \quad (\text{S4})$$

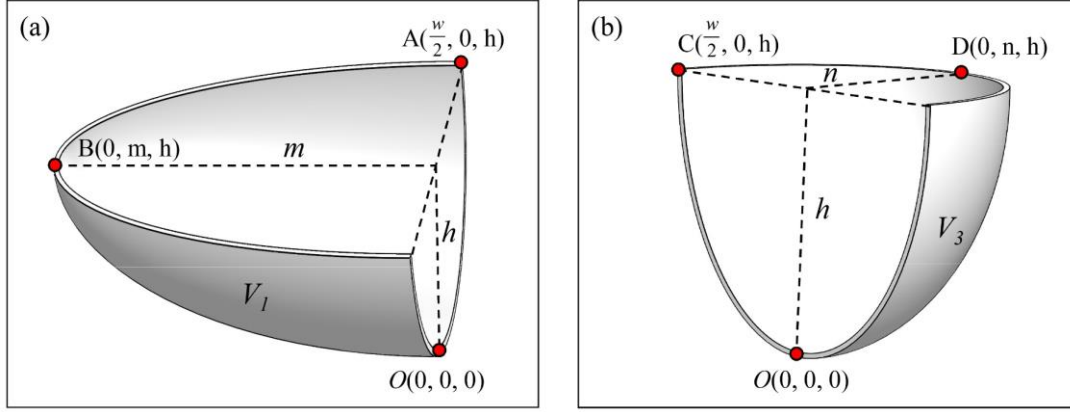

**Figure S1.** Schematic illustration of the ellipsoidal paraboloid at outlet (a) and inlet (b) of the MDL.

### S1.2 Volume calculation of parabolic cylinder

As illustrated in Figure S2 a, the central section of the MDL is represented as a parabolic cylinder to calculate the volume  $V_2$ , with  $P_s$  representing its cross-section. Figure S2 b illustrates that  $P_s$  takes the shape of a paraboloid, defined by the equation  $y=kx^2$ . Assuming that point F ( $w \cdot 2^{-1}$ ,  $h$ ) lies on the parabola, we can express the parameter  $x$  as follows:

$$k = \frac{4h}{w^2}, \quad y = \frac{4h}{w^2} x^2, \quad x = \sqrt{y} \frac{w}{2\sqrt{h}} \quad (\text{S5})$$

The area of  $P_s$  can be calculated using the following formula:

$$S_{P_s} = 2 \int_0^h \sqrt{y} \frac{w}{2\sqrt{h}} dy = \frac{2wh}{3} \quad (\text{S6})$$

Therefore, the volume of the parabolic cylinder is given by:

$$V_2 = S_{P_s} r = \frac{2}{3} whr \quad (\text{S7})$$

In the volume equations provided for  $V_1$ ,  $V_2$  and  $V_3$  of the MDL, the variables involved are  $w$ ,  $h$ ,  $m$ ,  $n$  and  $r$ . With the exception of the unknown parameter  $h$ , all other parameters can be automatically determined based on the boundary data of the

MDL. Subsequently, we can derive the expression for the variable  $h$  using point F. As point F ( $w \cdot 2^{-1}$ ,  $h$ ) lies on the parabola shown in Figure S2 b, we can employ the geometric interpretation of the derivative to obtain the derivative  $y'(w \cdot 2^{-1})$ , which represents the slope of the tangent line at point F on the parabola. In this context, we denote the average slope around the MDL as  $a$ .

Thus,

$$y'(\frac{w}{2}) = 2 \times \frac{4h}{w^2} \times \frac{w}{2} = \tan(\alpha) \quad (S8)$$

$$h = \frac{w \tan(\alpha)}{4} \quad (S9)$$

Finally, considering the four distinct types of MDL, we can focus on the case where  $r=0$  and  $n=0$ , which corresponds to GCL-1. In this scenario, the volume of the GCL-1 can be represented by the following expression:

$$V_{\text{GCL1}} = \frac{\pi w m h}{8} \quad (S10)$$

When  $n=0$ , the model of MDL corresponds to GCL-2, and its volume can be represented by the following expression:

$$V_{\text{GCL2}} = \frac{\pi w m h}{8} + \frac{2}{3} w h r \quad (S11)$$

When  $r=0$ , the model of MDL conforms to GUL-1, and its volume can be expressed as:

$$V_{\text{GUL1}} = \frac{\pi w m h}{8} + \frac{\pi w n h}{8} = \frac{\pi w h l}{4} \quad (S12)$$

When the type of MDL corresponds to GUL-2, its volume can be expressed as:

$$V_{\text{GUL2}} = \frac{\pi w m h}{8} + \frac{2}{3} w h r + \frac{\pi w n h}{8} = \frac{\pi w h (l - r)}{4} + \frac{2}{3} w h r \quad (S13)$$

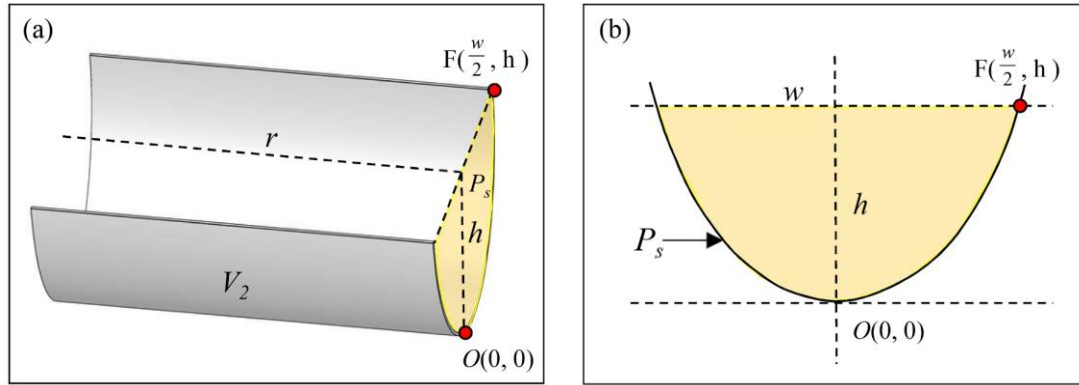

**Figure S2.** Parabolic cylinder (a) in the middle of the MDL and its schematic of the cross-section (b)
