# Supplementary material for: A mathematical model to improve water storage of glacial lake prediction towards addressing glacial lake outburst floods
Source: Copernicus journal article supplement (doi:10.5194/hess-29-969-2025), 2025-02-24
Supplement: Supplementary file 1 [file hess-29-969-2025-supplement.zip]

## Sheet: Table S1
Table S1. The glacial lake bathymetry data set used in this study to verify the estimation accuracy of different formulas
Lake	Type	Observation year	Area	Volume	Measurements based on remote sensing images							Source
			(km2)	(106 m3)	l	w	R	a	m	r	h
Kajiaqu	GCL2	2021	0.29	3.45	1436	230	0.13	14	287	1149	15	This study
Bienong Co	GCL2	2021	1.17	102	2085	723	0.33	25	626	1460	84
Longmuqie Co	GCL2	2020	0.58	8.28	1775	380	0.21	12	355	1420	21
Tanong Co	GUL2	2021	0.13	1.82	805	200	0.25	19	0	523	17
Maqiongco	GCL2	2021	0.22	3.32	910	320	0.36	13	0	501	19
Zhasuo Co	GUL2	2021	0.33	4.28	890	380	0.4	12	0	356	21
Jialong Co	GUL2	2020	0.55	37.53	1285	597	0.46	24	0	514	67
Paqu Co	GUL2	2020	0.58	8.8	2134	314	0.15	14	0	1387	19
Chmaqudan Co	GUL2	2020	0.56	19.6	1459	450	0.31	19	0	802	38
Tara Co	GUL2	2020	0.23	2.64	1024	255	0.26	15	0	666	17
Jialong Co	GUL2	2021	0.46	18.2	1133	537	0.47	17	0	453	41	Zhou Luxu，Liu Jiankang，Li Yuanling． Calculation method of mathematical model of the moraine dammed lake storage capacity［J］． ScienceTechnology and Engineering，2020，20( 24) : 9804-9809
Rewuco	GCL1	2021	0.42	13.85	839	613	0.73	15	839	0	42	Zhang, G.,T. Bolch, T. Yao, D. R. Rounce, W. Chen, G. Veh, O. King, S. K. Allen, M. Wang, and W. Wang (2023), Underestimated mass loss from lake-terminating glaciers in the greater Himalaya. Nature Geoscience. 16, 333–338. https://doi.org/10.1038/s41561-023-01150-1
PoiquNo.	GCL2	2021	0.09	2.53	428	300	0.64	22	150	278	30
Ranzeriaco	GCL2	2021	0.29	3.88	1181	288	0.23	12	236	945	15
BethungTsho	GCL2	2021	0.45	4.28	1355	373	0.28	9	271	1084	15
Guangxieco	GCL2	2021	0.41	2.61	1032	390	0.3	7	310	722	12
Shishapangma	GCL2	2021	0.6	18.59	1721	500	0.29	12	344	1377	26
Lugge	GCL2	2021	1.63	71.76	3163	578	0.18	23	633	2531	62
Raphstreng2	GCL2	2021	1.31	58.19	2117	816	0.39	16	635	1482	59
Galongco	GCL2	2021	5.49	377.39	4284	1500	0.35	16	1285	2999	107
Bnecuoguoco	GUL1	2021	0.11	1.69	490	288	0.59	14	0	0	18
Cirenma Co	GUL2	2021	0.33	12.43	1276	367	0.29	22	0	829	36
Longbasaba	GCL2	2009	1.15	56.16	2114	680	0.3	17	634	1479	52	Yao, X.J., Liu, S.Y., Sun, M.P., Wei, J.F., Guo, W.Q. (2012). Volume calculation and analysis of the changes in moraine-dammed lakes in the north Himalaya: a case study of Longbasaba lake. J. Glaciol, 58, 753–760. https://doi.org/10.3189/2012JoG11J048
Midui	GCL2	2010	0.22	1.13	968	280	0.31	7	290	678	8	Yang, R. M., Zhu, L. P., Wang, Y.J. et al.(2012). Study on the Variations of Lake Area & Volume and Their Effect on the Occurrence of Outburst of MUDUI Glacier Lake in Southeastern Tibet[J].PROGRESS IN GEOGRAPHY,2012,31(09):1133-1140.
Lugge	GCL2	2002	1.18	58.3	2520	545	0.2	19	504	2016	47	Yamada, T., N. Naito, S. Kohshima, H. Fushimi, F, et al. (2004) Outline of 2002 –research activity on glaciers and glacier lakes in Lunana region, Bhutan Himalayas. Bulletin of Glaciological Research, 21: 79-90.
Thulagi	GCL2	1995	0.76	31.8	1991	437	0.22	28	398	1593	57	WECS (Water and Energy Commission Secretariat). (1995). Preliminary Report on the Thulagi Glacier Lake, Dhana Khola, Marsyangdi Basin, WECS Report No. 473, Seq. No. 2/3/170795/1/1. Kathmandu, Nepal: WECS.
Tsho_Rolpa	GCL2	1993	1.39	76.6	2942	590	0.2	22	588	2353	59	WECS (Water and Energy Commission Secretariat). (1994). Report for the Field Investigation on the Tsho Rolpa Glacier, Rolwaling Valley, February 1993–June 1994, WECS N551.489 KAD. Kathmandu, Nepal: WECS.
Imja Tsho	GCL2	1992	0.6	28	1341	543	0.38	22	402	939	54	WECS (Water and Energy Commission Secretariat). (1992). Report for the first research expedition to Imja Glacial Lake - 25 March to 12 April, 1992. WECS Report No. 3/4/120892/1/1. Seq No. 412.
Cirenma Co	GUL2	2012	0.33	13.9	1276	370	0.29	22	0	829	37	Wang, W.C., Yang, G., Pablo, I.A., Lei, Y.B., Xiang, Y., Zhang, G.Q., Li, S.H., Lu, A.X., 2015. Integrated hazard assessment of Cirenmaco glacial lake in Zhangzangbo Valley, Central Himalayas. Geomorphology 306, 292–305.
Pidahu	GCL2	2004	0.89	50.44	2071	500	0.21	22	414	1657	50	Wang, X., Liu, S., Guo, W., & Xu, J. (2008). Assessment and Simulation for Glacier Lake Outburst flood of Longbasaba and Pida Lakes, China. Mountain Research and Development, 28(3), 310–317. https://doi.org/10.1659/mrd.0919
Imja Tsho	GCL2	2012	1.14	63.8	2191	605	0.24	23	438	1753	65	Somos-Valenzuela, M. A., McKinney, D. C., Byers, A. C., et al. (2013). Bathymetric Survey of Imja Lake, Nepal in 2012. Center for Research in Water Resources, University of Texas at Austin.
South Lhonak	GCL2	2016	1.31	65.8	2328	715	0.31	22	699	1630	73	Sharma, R. K., Pradhan, P., Sharma, N. P., et al. (2018). Remote sensing and in situ-based assessment of rapidly growing South Lhonak glacial lake in eastern Himalaya, India. Natural Hazards, 93, 393–409.
Tam_Pokhari	GCL2	1999	0.45	21.25	1178	470	0.41	34	353	825	80	Mool, P.K., Bajracharya, S.R., Joshi, S.P. (2001). Inventory of Glaciers and Glacial Lakes and Glacial Lake Outburst Floods, Monitoring and Early Warning Systems in the Hindu Kush-Himalayan Region, Nepal. ICIMOD and UNEP RRC-AP.
Thulagi	GCL2	2013	0.91	23.3	2522	417	0.17	25	504	2017	49	Leonard, G., Kargel, J., Regmi, D., et al. (2014). Compounding Hazards Facing Nepalese Villages due to Glacial Lake Thulagi, Extreme Monsoons, and Landslides. Poster presented in EGU 2014–16670 (personal communication with Jeffrey Kargel).
Imja Tsho	GCL2	2009	1.03	35.5	2028	556	0.27	21	406	1622	54	ICIMOD (Internal Centre for Integrated Mountain Development). (2011). Glacial Lakes and Glacial Lake Outburst Floods in Nepal. ICIMOD, Kathmandu.
Thulagi	GCL2	2009	0.94	35.37	2541	430	0.17	27	508	2033	54
Tsho_Rolpa	GCL2	2009	1.54	85.94	3304	566	0.17	23	661	2643	60
Thulagi	GCL2	2017	0.92	36.1	2504	439	0.18	27	501	2003	56	Haritashya, U.K., Kargel, J.S., Shugar, D.H., et al. (2018). Evolution and Controls of Large Glacial Lakes in the Nepal Himalaya. Remote Sensing, 10(5), 798. https://doi.org/10.3390/rs10050798
Lower_Barun	GCL2	2020	2.14	103.6	3297	730	0.22	23	659	2638	76
Lower_Barun	GCL2	2015	1.77	112.3	3091	717	0.23	22	618	2473	72
Imja Tsho	GCL2	2014	1.15	78.4	2208	610	0.24	25	442	1767	72
Amphulapche	GUL1	2014	0.12	3.2	404	369	0.99	19	0	0	32
Chamlang Tsho	GCL2	2009	0.76	35	1627	588	0.32	18	488	1139	47	Damodar, L., Takanobu, S., Teiji, W., et al. (2016). Assessment of glacial lake development and prospects of outburst susceptibility: Chamlang South Glacier, eastern Nepal Himalaya. Geomatics, Natural Hazards and Risk, 7:1, 403–423. https://doi.org/10.1080/19475705.2014.938253
Imja Tsho	GCL2	1999	0.75	33.48	1557	550	0.32	19	467	1090	48	Budhathoki, K. P., Bajracharya, O. R., & Pokharel, B. K. (2010). Assessment of Imja Glacier Lake Outburst Flood (GLOF) Risk in Dudh Koshi River Basin using Remote Sensing Techniques. Journal of Hydrology and Meteorology, 7(1), 75–91. https://doi.org/10.3126/jhm.v7i1.4176

## Sheet: Table S2
Table S2. we compared the lake volume model proposed by Zhou et al. (2020), and also included 20 formulas (EqS1-EqS20) collected by Qi et al. (2022) in our evaluation. Detailed results are shown in the table. EqS1-EqS20 represents formulas and E1-E20 represents the relative error of 20 equations.
ID							This study		Zhou et al., 2020
	Area(km2)	Volume(km3)	Lake Name	Length	width	R	MDLVM	error	Volume	error	EqS1	E1	EqS2	E2	EqS3	E3	EqS4	E4	EqS5	E5	EqS6	E6	EqS7	E7	EqS8	E8	EqS9	E9	EqS10	E10	EqS11	E11	EqS12	E12	EqS13	E13	EqS14	E14	EqS15	E15	EqS16	E16	EqS17	E17	EqS18	E18	EqS19	E19	EqS20
1	0.420847	0.0138512	Rewuco	838.821	613	0.730788	0.00851761	0.385064	0.0226001	0.631631	0.0122444	0.116002	0.00694579	0.498542	0.0107932	0.220774	0.0251486	0.815623	0.00955551	0.310131	0.0304291	1.19686	0.0107551	0.223524	0.0089128	0.356532	0.00914438	0.339813	0.00897388	0.352122	0.00951919	0.312754	0.0186431	0.345954	0.0925753	5.68355	0.0119171	0.139636	0.00991396	0.284252	0.0114188	0.175607	0.0311539	1.24918	0.0157802	0.139269	0.0114956	0.170063	0.022036
2	0.0940866	0.00253297	PoiquNo.1	427.537	300	0.64	0.00220724	0.128595	0.00275889	0.0891937	0.00181168	0.28476	0.000842339	0.66745	0.00138125	0.454691	0.00293466	0.158585	0.00101009	0.601224	0.00362612	0.43157	0.00129535	0.488603	0.00129356	0.489312	0.00117007	0.538065	0.00123478	0.512515	0.00120839	0.522934	0.00286597	0.131468	0.0125788	3.96604	0.0012922	0.489848	0.0010638	0.58002	0.00134544	0.46883	0.0017846	0.295453	0.00166809	0.341449	0.00116055	0.541822	0.00546786
3	0.287057	0.00388292	Ranzeriaco	1180.95	288	0.23	0.00316173	0.185735	0.00702322	0.808746	0.00853902	1.19912	0.00405252	0.0436777	0.00638439	0.644223	0.0145293	2.74186	0.00538295	0.386316	0.0176746	3.55187	0.00626404	0.613228	0.00544427	0.402107	0.00540886	0.392988	0.00540743	0.392618	0.00561915	0.447146	0.0115564	1.97622	0.0556044	13.3203	0.00675708	0.740207	0.00560629	0.443833	0.00396369	0.0208003	0.0147786	2.80605	0.00888957	1.2894	0.00640027	0.648312	0.0154362
4	0.450655	0.00427561	BethungTsho	1354.75	373	0.28	0.00451191	0.0552658	0.0135144	2.16081	0.014927	2.49119	0.00764852	0.788871	0.011856	1.77295	0.0277417	5.48835	0.0105885	1.47649	0.0335346	6.84322	0.011847	1.77083	0.00973433	1.27671	0.0100449	1.34935	0.00982495	1.29791	0.0104604	1.44653	0.0203081	3.74974	0.101413	22.719	0.01319	2.08494	0.0109782	1.56763	0.00779318	0.822707	0.035624	7.33192	0.0174862	3.08975	0.0127651	1.98557	0.0234846
5	0.294621	0.00345257	Kajiaqu	1436.21	230	0.13	0.00300136	0.13069	0.00544743	0.577791	0.00915102	1.6505	0.00420371	0.217559	0.0066164	0.916368	0.0150815	3.36819	0.00559712	0.621145	0.0183395	4.31185	0.00649851	0.882225	0.0056298	0.630611	0.00560544	0.623555	0.00559688	0.621077	0.00582417	0.686909	0.0119383	2.4578	0.0575652	15.6731	0.00702281	1.03408	0.00582782	0.687966	0.00336752	0.0246332	0.0155435	3.50202	0.00924324	1.67721	0.00666022	0.929061	0.0158143
6	0.405828	0.00260753	Guangxieco	1032	390	0.3	0.00271089	0.0396401	0.0112545	3.31617	0.013016	3.9917	0.00659926	1.53085	0.0102681	2.93788	0.0238716	8.15487	0.00904858	2.47017	0.0288987	10.0828	0.0102168	2.91821	0.00850512	2.26175	0.00869948	2.33629	0.00855234	2.27986	0.0090543	2.47237	0.0178152	5.8322	0.0881996	32.825	0.0112918	3.33047	0.00939143	2.60166	0.00730084	1.79991	0.029015	10.1274	0.0149431	4.73075	0.0108736	3.17009	0.0213034
7	0.60118	0.0185941	Shishapangma	1721.23	500	0.29	0.0136074	0.268189	0.030853	0.659292	0.0213314	0.147215	0.0114773	0.382744	0.017608	0.0530345	0.0419384	1.25547	0.0163145	0.122595	0.0504917	1.71547	0.0178011	0.0426491	0.0141112	0.241095	0.0149186	0.19767	0.0143894	0.226131	0.0155595	0.163204	0.0291151	0.565826	0.148887	7.00724	0.0202236	0.0876366	0.0168663	0.0929226	0.0135266	0.272535	0.062771	2.37585	0.0269423	0.448971	0.019843	0.0671685	0.0307067
8	1.16647	0.102	Bienong Co	2085	723	0.33	0.0956892	0.0618752	0.0781451	0.233871	0.0477416	0.531945	0.0291907	0.713816	0.04373	0.571274	0.108496	0.0636895	0.0440938	0.567708	0.129417	0.268799	0.0454125	0.554779	0.0331476	0.675024	0.0370533	0.636732	0.0346083	0.660703	0.038781	0.619794	0.0666736	0.346337	0.360092	2.53031	0.0540468	0.470129	0.0452838	0.556041	0.0369106	0.638132	0.232902	1.28335	0.0728178	0.2861	0.0547329	0.463403	0.0568939
9	1.62646	0.0717637	Luggye2	3163.23	578	0.18	0.069018	0.0382609	0.0757715	0.0558467	0.0717619	2.54113e-05	0.0466187	0.350385	0.0690101	0.038371	0.17476	1.43521	0.0725992	0.011642	0.20749	1.8913	0.0726365	0.0121624	0.0508695	0.291152	0.0584756	0.185165	0.0537434	0.251106	0.06131	0.145668	0.101022	0.407703	0.560753	6.81388	0.0884854	0.23301	0.0743111	0.0354971	0.0417967	0.417579	0.450808	5.28184	0.119892	0.670655	0.0910405	0.268614	0.0775152
10	1.30909	0.0581897	Raphstreng2	2117.45	816	0.39	0.0591338	0.0162245	0.101091	0.737265	0.0546907	0.0601317	0.0343397	0.409866	0.051231	0.119587	0.128013	1.19993	0.0524231	0.0990996	0.152451	1.6199	0.0534512	0.0814322	0.0384589	0.339077	0.0434096	0.253999	0.0403189	0.307113	0.0454614	0.218738	0.077015	0.323515	0.419916	6.21633	0.0641305	0.102093	0.0537759	0.075852	0.0464151	0.202348	0.292838	4.03248	0.086573	0.487773	0.0653028	0.122239	0.0633397
11	5.48515	0.377392	Galongco	4283.95	1500	0.35	0.403178	0.0683279	0.691107	0.831272	0.303995	0.194484	0.258266	0.315657	0.365987	0.0302216	0.998884	1.64681	0.449625	0.1914	1.16595	2.0895	0.404659	0.0722522	0.243592	0.354538	0.310156	0.17816	0.268736	0.287913	0.327292	0.132753	0.461687	0.223363	2.83274	6.50609	0.536809	0.422418	0.454667	0.204759	0.348307	0.0770689	5.08671	12.4786	0.742523	0.967513	0.585277	0.550845	0.240208
12	0.583252	0.00828	Longmuqie Co	1774.91	380	0.21	0.00846792	0.0226955	0.0183765	1.21939	0.0208049	1.51267	0.0109982	0.32829	0.0168914	1.04002	0.0401566	3.84983	0.0155902	0.882878	0.048367	4.84143	0.0170557	1.05986	0.0135713	0.639049	0.0143114	0.72843	0.013824	0.669567	0.0149238	0.802389	0.0280339	2.38573	0.143001	16.2707	0.0193357	1.33523	0.0161224	0.947144	0.0102536	0.238354	0.0591371	6.14216	0.0257462	2.10944	0.0189445	1.28798	0.0298538
13	2.13833	0.1036	Lower_Barun-1	3296.99	730	0.22	0.111377	0.0750632	0.125974	0.215968	0.0993113	0.041397	0.0685351	0.338464	0.100461	0.0302963	0.25873	1.4974	0.109441	0.0563831	0.306013	1.9538	0.106919	0.032035	0.0723706	0.301442	0.0851281	0.1783	0.0772076	0.254753	0.089384	0.13722	0.142219	0.372768	0.807429	6.79372	0.132771	0.281569	0.111716	0.0783386	0.068277	0.340956	0.77712	6.50116	0.180734	0.744541	0.138399	0.335895	0.0999883
14	0.917431	0.0361	Thulagi-4	2504.11	439	0.18	0.0377491	0.0456805	0.034602	0.0414955	0.0361457	0.00126568	0.0208142	0.423429	0.0314513	0.128772	0.0768864	1.12982	0.0307559	0.148037	0.0920211	1.54906	0.0323452	0.10401	0.0243261	0.326147	0.0266487	0.261809	0.0251818	0.302442	0.0278558	0.228372	0.0493832	0.367956	0.261484	6.24332	0.0378524	0.0485417	0.0316619	0.122939	0.0183477	0.491753	0.14468	3.00775	0.0507911	0.406956	0.0378963	0.0497587	0.0455014
15	1.30702	0.0658	South Lhonak lake	2328.34	715	0.31	0.0712234	0.0824232	0.0853449	0.297034	0.0548435	0.166513	0.0342633	0.479281	0.0511199	0.223101	0.127723	0.94108	0.0522989	0.205183	0.152109	1.31169	0.0533319	0.189485	0.0383806	0.416708	0.0433155	0.34171	0.0402346	0.388532	0.0453625	0.3106	0.0768629	0.168129	0.419033	5.36828	0.0639803	0.0276554	0.0536494	0.18466	0.0409294	0.377972	0.29192	3.43648	0.086368	0.312583	0.0651449	0.00995588	0.0632466
16	1.77496	0.1123	Lower_Barun-2	3091.39	717	0.23	0.0974484	0.132249	0.113949	0.0146843	0.0794854	0.292205	0.0527229	0.530518	0.0778016	0.307199	0.198086	0.763903	0.0827656	0.262996	0.234898	1.0917	0.0821803	0.268207	0.0569307	0.493048	0.0659256	0.412951	0.0603344	0.462739	0.0691533	0.38421	0.11268	0.00338497	0.629984	4.60983	0.100727	0.103057	0.0846432	0.246276	0.0557283	0.503755	0.536382	3.77633	0.136681	0.21711	0.104068	0.0733034	0.0840797
17	1.14764	0.0784	Imja Tsho-5	2208.26	610	0.24	0.0591205	0.245912	0.0589155	0.248527	0.0470999	0.399235	0.0285294	0.636105	0.0427642	0.454538	0.105994	0.351962	0.0430305	0.451142	0.126461	0.613025	0.0443803	0.433925	0.0324598	0.585971	0.0362349	0.53782	0.0338706	0.567977	0.0379212	0.516311	0.0653311	0.166696	0.352368	3.4945	0.0527581	0.327065	0.044199	0.436237	0.0309977	0.604621	0.225501	1.87629	0.0710618	0.0935995	0.0533863	0.319052	0.056039
18	0.911967	0.0233	Thulagi-3	2521.83	417	0.17	0.031827	0.365965	0.0314418	0.349431	0.0359191	0.541591	0.0206399	0.114169	0.0311946	0.338822	0.0762306	2.2717	0.0304815	0.308221	0.0912439	2.91605	0.0320734	0.376542	0.0241396	0.0360348	0.0264311	0.134383	0.0249835	0.0722522	0.0276275	0.185729	0.0490159	1.10369	0.259411	10.1335	0.0375185	0.610238	0.0313814	0.346839	0.0174158	0.252539	0.142979	5.13642	0.0503381	1.16043	0.0375514	0.611647	0.0452493
19	1.13823	0.0638	Imja Tsho-4	2191.48	605	0.24	0.0525514	0.176311	0.0575131	0.0985404	0.0466355	0.269036	0.0282005	0.557986	0.0422837	0.337246	0.10475	0.641845	0.0425023	0.333819	0.124991	0.95911	0.043867	0.31243	0.0321173	0.496594	0.0358278	0.438436	0.0335034	0.474869	0.0374934	0.412329	0.0646621	0.0135127	0.348524	4.46276	0.0521178	0.183106	0.0436601	0.315672	0.0305102	0.521783	0.221847	2.47723	0.0701895	0.10015	0.0527177	0.173704	0.0556113
20	0.223041	0.0011308	Midui	968.293	280	0.31	0.00134306	0.187706	0.00544304	3.81344	0.00588518	4.20444	0.00284053	1.51196	0.00451573	2.99339	0.0101182	7.94784	0.00368677	2.26032	0.0123521	9.92333	0.00438555	2.87828	0.00393326	2.4783	0.00382563	2.38312	0.00387171	2.42387	0.00396906	2.50996	0.00843033	6.45519	0.0397284	34.133	0.00464779	3.11018	0.00384943	2.40417	0.0030066	1.65882	0.009077	7.02706	0.00608844	4.38419	0.0043497	2.84657	0.0122063
21	1.02856	0.0355	Imja Tsho-3	2027.99	556	0.27	0.0370289	0.0430682	0.0449506	0.266213	0.0411799	0.159996	0.0244506	0.311251	0.0367948	0.0364719	0.0905848	1.55168	0.0365099	0.0284488	0.108243	2.04909	0.0380162	0.0708782	0.028187	0.206001	0.0311766	0.121787	0.0292975	0.174717	0.0326085	0.0814514	0.0569703	0.604797	0.304513	7.57782	0.0448469	0.263292	0.0375425	0.0575352	0.0255041	0.281574	0.181464	4.11167	0.0602935	0.69841	0.0451444	0.271674	0.0506086
22	0.759066	0.035	Chamlang South Tsho	1626.84	588	0.32	0.0265285	0.242043	0.0403292	0.152262	0.0283147	0.19101	0.0159392	0.544595	0.0242493	0.307163	0.0585923	0.674065	0.0231466	0.338668	0.0703122	1.00892	0.0247479	0.292918	0.0190566	0.455526	0.020546	0.41297	0.0195943	0.440162	0.0214551	0.386996	0.0389684	0.113382	0.203141	4.80402	0.0285793	0.18345	0.0238737	0.317895	0.0198177	0.43378	0.0994504	1.84144	0.038225	0.0921429	0.028355	0.189857	0.0381469
23	0.938964	0.03537	Thulagi-2	2540.74	430	0.17	0.0361882	0.0231313	0.0336834	0.047685	0.0372006	0.051757	0.0215055	0.391985	0.0324688	0.0820233	0.0794873	1.24731	0.031845	0.0996602	0.0951031	1.68881	0.0334231	0.0550448	0.0250642	0.291371	0.0275109	0.222197	0.0259673	0.265837	0.0287606	0.186865	0.0508363	0.437272	0.269693	6.62491	0.0391774	0.107644	0.0327755	0.0733528	0.0184319	0.478884	0.151483	3.2828	0.0525898	0.486847	0.0392663	0.110157	0.0464943
24	1.15169	0.05616	Longbasaba	2113.55	680	0.3	0.0434683	0.225992	0.0700728	0.247735	0.047107	0.1612	0.0286713	0.489472	0.0429715	0.234838	0.106531	0.896914	0.0432585	0.229727	0.127095	1.2631	0.0446018	0.205809	0.0326075	0.419381	0.0364106	0.351663	0.034029	0.394071	0.0381057	0.321479	0.0656194	0.168437	0.354027	5.30389	0.0530345	0.0556533	0.0444317	0.208837	0.0344125	0.387242	0.227083	3.04351	0.0714384	0.272051	0.053675	0.0442479	0.056223
25	1.5364	0.08594	Tsho_Rolpa-2	3303.89	566	0.17	0.0685829	0.201967	0.0758888	0.116956	0.067076	0.219502	0.043025	0.49936	0.0638206	0.257382	0.161052	0.874003	0.0666536	0.224417	0.191368	1.22676	0.0670196	0.220158	0.0472699	0.449967	0.054078	0.370747	0.0498392	0.420069	0.0566822	0.340444	0.0940789	0.094705	0.519768	5.04804	0.0813175	0.0537879	0.0682642	0.205676	0.0387265	0.549378	0.402532	3.68387	0.110074	0.28082	0.0834386	0.0291062	0.073514
26	0.893897	0.05044	Pidahu	2070.89	500	0.21	0.0313652	0.378169	0.0371206	0.264063	0.0349364	0.307367	0.0200662	0.602176	0.0303494	0.398307	0.0740739	0.468555	0.0295801	0.413559	0.0886873	0.758273	0.0311792	0.381856	0.0235251	0.533602	0.025715	0.490187	0.0243302	0.517642	0.0268761	0.467168	0.0478049	0.0522432	0.252585	4.00763	0.0364213	0.277928	0.0304594	0.396127	0.0201127	0.601255	0.137424	1.7245	0.0488494	0.031535	0.0364184	0.277985	0.0444145
27	1.17927	0.0583	Lugge	2519.51	545	0.2	0.0391835	0.3279	0.0536572	0.079636	0.0487947	0.163041	0.0296428	0.491547	0.0443899	0.238595	0.110208	0.890353	0.0448215	0.231191	0.131439	1.25452	0.0461181	0.208951	0.033617	0.42338	0.0376125	0.354845	0.035112	0.397736	0.0393686	0.324725	0.0675894	0.159337	0.365366	5.267	0.0549287	0.0578275	0.0460262	0.210528	0.0287093	0.50756	0.238001	3.08234	0.0740196	0.269632	0.0556548	0.0453716	0.0574745
28	0.44826	0.02125	Tam_Pokhari	1178.2	470	0.41	0.0260174	0.22435	0.018661	0.121835	0.014409	0.321927	0.00759131	0.642762	0.0117696	0.446135	0.0275304	0.295549	0.0105042	0.505685	0.0332817	0.566197	0.0117581	0.446678	0.00966771	0.545049	0.00997169	0.530744	0.00975586	0.540901	0.0103839	0.511347	0.0201732	0.0506732	0.100696	3.73861	0.0130862	0.384181	0.0108913	0.487466	0.00953448	0.551319	0.0352537	0.658998	0.0173469	0.183675	0.0126614	0.404169	0.0233685
29	0.751127	0.03348	Imja Tsho-2	1556.76	550	0.32	0.0241329	0.279183	0.0337649	0.00850962	0.0279516	0.165125	0.0157049	0.530917	0.0239019	0.286084	0.0577155	0.72388	0.0227844	0.319461	0.0692702	1.069	0.024383	0.271716	0.0188002	0.438465	0.0202517	0.395111	0.0193235	0.422836	0.0211466	0.368382	0.0384596	0.148733	0.200315	4.98312	0.0281371	0.159585	0.0235026	0.298011	0.0184402	0.449218	0.0974054	1.90936	0.0376269	0.123861	0.0279023	0.166597	0.0377756
30	0.76033	0.0318	Thulagi-1	1990.86	437	0.22	0.0303338	0.0461077	0.0272598	0.142773	0.0286943	0.0976642	0.0159765	0.497593	0.0243047	0.235701	0.0587322	0.846923	0.0232044	0.270301	0.0704784	1.2163	0.0248061	0.219935	0.0190975	0.399451	0.020593	0.352422	0.0196375	0.382468	0.0215043	0.323763	0.0390495	0.22797	0.203591	5.40224	0.0286498	0.0990626	0.0239329	0.247393	0.0151435	0.52379	0.0997777	2.13766	0.0383205	0.205046	0.0284273	0.10606	0.038206
31	1.39302	0.0766	Tsho_Rolpa-1	2941.84	590	0.2	0.062591	0.182885	0.0734247	0.0414531	0.0595735	0.222278	0.0374803	0.510701	0.0557918	0.271647	0.139944	0.826945	0.0575446	0.248766	0.166515	1.17382	0.0583563	0.238168	0.0416647	0.456075	0.0472744	0.382841	0.0437764	0.428507	0.0495252	0.353457	0.0832357	0.0866277	0.456164	4.95514	0.0703214	0.0819666	0.0589928	0.229859	0.0364832	0.523718	0.331313	3.32524	0.0950307	0.24061	0.0718193	0.0624107	0.0671096
32	0.598069	0.028	Imja Tsho-1	1340.93	543	0.38	0.023177	0.172249	0.0283482	0.0124365	0.0209055	0.253376	0.0113938	0.59308	0.017483	0.375605	0.0416276	0.486699	0.0161881	0.421854	0.0501211	0.790039	0.0176711	0.36889	0.0140172	0.499387	0.0148128	0.470973	0.0142909	0.489611	0.0154486	0.448263	0.0289269	0.0331043	0.147862	4.28078	0.0200686	0.283263	0.0167364	0.402271	0.014511	0.481751	0.0621327	1.21902	0.0267335	0.0452334	0.0196861	0.296926	0.0305588
33	0.112847	0.00169161	Bnecuoguoco	490.083	288	0.59	0.00197741	0.168952	0.00291457	0.722954	0.00117338	0.306353	0.00108815	0.356738	0.00177272	0.0479462	0.0038088	1.25158	0.00132679	0.215665	0.00469427	1.77503	0.00167476	0.00996143	0.00163501	0.0334605	0.00150171	0.112261	0.00157085	0.0713853	0.00155239	0.0822994	0.00359728	1.12654	0.0160269	8.47432	0.00169211	0.000298237	0.0013948	0.175461	0.00155819	0.0788728	0.00249715	0.476197	0.0021911	0.295273	0.00153296	0.0937867	0.00647564
34	0.121422	0.0032	Amphulapche	403.903	369	0.99	0.00379413	0.185667	0.0039432	0.23225	0.000164457	0.948607	0.00120637	0.623008	0.00196016	0.38745	0.00423058	0.322056	0.00148085	0.537233	0.00520875	0.627736	0.00185734	0.41958	0.0017968	0.4385	0.00166051	0.481092	0.00173081	0.459123	0.00171722	0.46337	0.00394215	0.231921	0.0176697	4.52177	0.00188625	0.410546	0.00155562	0.513869	0.00207983	0.350053	0.00286234	0.105519	0.00244552	0.235774	0.00171482	0.46412	0.00693228
35	0.463625	0.0182	Jialong Co-2	1132.55	537	0.47	0.0185948	0.0216921	0.0234167	0.28663	0.0148563	0.18372	0.00796033	0.562619	0.0123268	0.322703	0.0288937	0.587564	0.0110489	0.392918	0.0349133	0.918311	0.0123316	0.322442	0.0100968	0.445232	0.0104438	0.426165	0.0102011	0.439502	0.0108774	0.402338	0.0210412	0.156112	0.105321	4.78684	0.0137569	0.244128	0.0114523	0.370755	0.0111349	0.388193	0.0376625	1.06937	0.0182464	0.00255205	0.0133318	0.267486	0.0241129
36	0.130698	0.00182084	Tanong Co	804.692	200	0.25	0.0019151	0.0514856	0.00230786	0.267469	0.00285092	0.565718	0.00133817	0.265082	0.00216856	0.190968	0.00470165	1.58213	0.00165376	0.0917597	0.00578277	2.17588	0.00206095	0.131869	0.00197558	0.0849832	0.00183706	0.00891037	0.00190801	0.0478752	0.00190055	0.0437739	0.00432215	1.37371	0.0194908	9.70429	0.00210386	0.155434	0.00173598	0.0466057	0.00133312	0.267853	0.00328532	0.804286	0.00273107	0.499894	0.00191937	0.0541148	0.00742377
37	0.331869	0.0124274	Cirenmaco2	1276.04	367	0.29	0.0120296	0.0320094	0.0123229	0.0084059	0.0100847	0.188511	0.00497103	0.599995	0.00779074	0.3731	0.017889	0.439481	0.00669143	0.461558	0.0217173	0.747538	0.00768892	0.381293	0.00656307	0.471887	0.00660042	0.468881	0.00655241	0.472745	0.00686231	0.447808	0.0138539	0.114786	0.0674604	4.42836	0.0083789	0.325772	0.00695895	0.440032	0.00565738	0.544766	0.0195916	0.576482	0.0110504	0.110802	0.00799154	0.356942	0.0176667
38	0.221745	0.00332493	Maqiongco	910.029	320	0.36	0.00358139	0.0770383	0.00668151	1.00952	0.00567695	0.707389	0.00281731	0.152671	0.00447975	0.347322	0.010034	2.01781	0.00365468	0.0991755	0.0122503	2.68438	0.00434959	0.308174	0.00390384	0.174111	0.00379515	0.141423	0.00384195	0.155497	0.00393731	0.184179	0.00836914	1.51709	0.0394211	10.8562	0.00460779	0.385832	0.00381615	0.147739	0.00335279	0.0083786	0.00897582	1.69955	0.00603545	0.81521	0.00431107	0.296589	0.0121403
39	0.329535	0.00428215	Zhasuo Co	890	380	0.4	0.00517779	0.209156	0.0092146	1.15186	0.00963901	1.25097	0.00492185	0.149388	0.00771563	0.801811	0.0177088	3.1355	0.00662095	0.546174	0.0215007	4.02101	0.00761261	0.777754	0.00650365	0.518781	0.00653678	0.526518	0.00649145	0.515933	0.00679589	0.587028	0.0137322	2.20684	0.0668288	14.6064	0.00829164	0.936327	0.00688614	0.608103	0.00579322	0.352877	0.0193241	3.51272	0.010934	1.5534	0.00790565	0.846186	0.017551
40	0.552884	0.03753	Jialong Co-1	1285.35	597	0.46	0.0379521	0.0116479	0.0328464	0.124795	0.0186826	0.502196	0.0102004	0.728206	0.0156962	0.58177	0.0371926	0.00899135	0.0143886	0.616611	0.0448305	0.194523	0.0158146	0.578615	0.0126678	0.662461	0.0132987	0.645652	0.0128792	0.65683	0.0138638	0.630594	0.0262213	0.301323	0.133167	2.54829	0.0178616	0.524071	0.0148877	0.603313	0.0146387	0.609947	0.0532288	0.4183	0.0237617	0.36686	0.0174556	0.534889	0.0284049
41	0.575435	0.0088	Paqu Co-1	2134.16	314	0.15	0.00921856	0.0475633	0.0150871	0.714438	0.0206575	1.34745	0.0107912	0.226276	0.0165814	0.884255	0.0393871	3.47581	0.0152779	0.736121	0.0474491	4.39195	0.0167336	0.901546	0.0133374	0.515618	0.0140488	0.596455	0.0135792	0.543096	0.0146489	0.664647	0.027565	2.13239	0.140453	14.9606	0.0189526	1.15371	0.0158015	0.79562	0.00855902	0.0273838	0.0575866	5.54393	0.0252303	1.86708	0.0185572	1.10877	0.0294814
42	0.564945	0.0196	Chmaqudan Co	1458.82	450	0.31	0.0179117	0.0861376	0.021181	0.080664	0.0196871	0.00444454	0.0105152	0.46351	0.016168	0.175102	0.0383615	0.95722	0.014862	0.241736	0.0462255	1.35844	0.0163042	0.168153	0.013025	0.33546	0.0136985	0.301098	0.0132524	0.323855	0.0142822	0.271316	0.0269383	0.374402	0.137052	5.99244	0.0184425	0.0590569	0.0153742	0.215604	0.0115531	0.410555	0.0555381	1.83358	0.0245435	0.25222	0.0180418	0.0794976	0.028981
43	0.225311	0.00264	Tara Co	1024.14	255	0.26	0.00318869	0.207837	0.00477483	0.808647	0.00612907	1.32162	0.00288131	0.0914063	0.0045789	0.734431	0.0102662	2.8887	0.00374318	0.417871	0.0125309	3.74657	0.00444873	0.685124	0.0039849	0.50943	0.00387916	0.469377	0.00392395	0.486344	0.0040248	0.524546	0.00853768	2.23397	0.0402678	14.253	0.00471809	0.787156	0.00390793	0.480278	0.00280624	0.0629713	0.0092555	2.50587	0.00618159	1.34151	0.00441762	0.673342	0.0123218
44	0.331242	0.0139	Cirenma Co-1	1276	370	0.29	0.0122267	0.120379	0.0125249	0.0989301	0.01006	0.276258	0.00495779	0.643325	0.00777052	0.44097	0.0178405	0.283489	0.00667245	0.519968	0.021659	0.558203	0.00766837	0.448319	0.00654708	0.528987	0.00658329	0.526382	0.006536	0.529784	0.00684443	0.507595	0.0138211	0.00567392	0.0672904	3.84103	0.0083554	0.398892	0.00693934	0.500767	0.00568742	0.590833	0.0195195	0.404278	0.0110191	0.207261	0.0079684	0.426734	0.0176356
[truncated: 1 more columns]

## Sheet: Table S3
Table S3. Details of all empirical formulas used in this study
Formulas	Code	N	Dam material	Relationship	R2
Qi et al., 2022	EqS1	27(>0.1 km2)	Moraine (>0.1km2)	V=40.67A1.184-3.218Rmxw/mxl	0.96
		70(<0.1 km2)	Moraine (<0.1km2)	V=557.4A2.454+0.2005Rmxw/mxl	0.8
	EqS2	35(>0.5 km2)	Moraine	V=0.0126A2+0.0056A+0.0132	0.98
		227(<0.5 km2)	Moraine	V=0.0235A1.4083	0.9
Wang et al, (2012)	EqS3	20	Moraine	V=0.0354A1.3724	0.92
	EqS4	20	Moraine	V=0.087A1.434	0.5
Evans (1986)	EqS5	/	Ice	V=0.035A1.5	/
Huggel et al, (2002)	EqS6	15	Moraine, ice and bedrock	V=0.104A1.42	0.92
Cook and Quincey (2015)	EqS7	15	Moraine, ice and bedrock	Vstere=0.1217Asquare1.4129	0.95
	EqS8	42	Moraine, ice and bedrock	Vstere=0.5057Asquare1.2884	0.38
	EqS9	30	Moraine, ice and bedrock	Vstere=0.1746Asquare1.3725	0.6
	EqS10	57	Moraine, ice and bedrock	Vstere=0.3211Asquare1.324	0.57
	EqS11	45	Moraine, ice and bedrock	Vstere=0.1697Asqkm1.3778	0.75
Fujita et al, (2013)	EqS12	/	Moraine, ice and bedrock	V=0.055A1.25	/
Loriaux and Casassa (2013)	EqS13	31	Moraine and ice	V=0.2933A1.3324	0.96
Emmer and Vilimek (2013)	EqS14	35	Moraine and bedrock	Vstere =0.054393Asquare1.483009	0.92
Kapitsa et al, (2017)	EqS15	32	Moraine and bedrock	V=0.036A1.49	0.91
Muñoz et al., (2020)	EqS16	69	Moraine and ice	V=A(0.041Lw+2), Lw-lake width	0.85
O’Connor et al, (2001)	EqS17	/	Moraine	V=0.003114A+0.1685A2	/
Khanal et al, (2015)	EqS18	33	Moraine	V=0.0578A1.5	0.93
Sakai (2012)	EqS19	15	Moraine	V(×106 km3)=43.24A1.5307	/
Yao (2012)	EqS20	15	Moraine	V=0.0493A0.9304	0.99
