# Supplementary material for: A mathematical model to improve water storage of glacial lake prediction towards addressing glacial lake outburst floods
Source: Copernicus journal article supplement (doi:10.5194/hess-29-969-2025), 2025-02-24
Supplement: Supplementary file 2 [file hess-29-969-2025-supplement.zip]

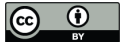

*Supplement of*

**A mathematical model to improve water storage of glacial lake prediction towards addressing glacial lake outburst floods**

**Miaomiao Qi et al.**

*Correspondence to:* Shiyin Liu ([shiyin.liu@ynu.edu.cn](mailto:shiyin.liu@ynu.edu.cn)) and Zhifang Zhao ([zhaozhifang@ynu.edu.cn](mailto:zhaozhifang@ynu.edu.cn))

- [hess-29-969-2025-supplement-title-page.pdf](#)
- [Supplement.pdf](#)
- [Tables S1-S3.xlsx](#)

The copyright of individual parts of the supplement might differ from the article licence.
